# Supplementary material
Source: Springer Nature journal article supplement (https://www.springermedizin.de/resource/supplementary/12879_2010_1418_MOESM6_ESM.pdf/9443212)
Supplement: MOESM6 [file 9443212]

**Table 2.**

| <b>Strain no.</b> | <b>Origin</b> | <b>MLST type</b> | <b><i>van</i> genotype</b> | <b>Chromosome (I-Ceul PFGE)</b> | <b>Plasmid</b> |
|-------------------|---------------|------------------|----------------------------|---------------------------------|----------------|
| UW 6714           | BC            | <b>202</b>       | -                          | -*                              | +              |
| UW 1245           | BC            | <b>202</b>       | <i>vanA</i>                | -                               | +              |
| UW 6293           | BC            | <b>202</b>       | <i>vanB</i>                | -*                              | -#             |
| UW 6295           | BC            | <b>202</b>       | <i>vanB</i>                | -*                              | -#             |
| UW 4962           | BC            | <b>203</b>       | <i>vanA</i>                | +                               | -#             |
| UW 6989           | BC            | <b>203</b>       | -                          | +                               | -#             |
| UW 6502           | BC            | <b>208</b>       | <i>vanB</i>                | +                               | +              |
| UW 5918           | BC            | <b>252</b>       | <i>vanA</i>                | +                               | +              |
| UW 4675           | BC            | <b>252</b>       | <i>vanB</i>                | +                               | -              |
| UW 6617           | BC            | <b>275</b>       | <i>vanA</i>                | -                               | +              |
| UW 4960           | BC            | <b>279</b>       | <i>vanB</i>                | +                               | -              |
| UW 6033           | BC            | <b>282</b>       | <i>vanA</i>                | +                               | +              |
| UW 4512           | BC            | <b>294</b>       | -                          | +                               | +              |
| UW 6297           | BC            | <b>306</b>       | -                          | +                               | +              |
| UW 6935           | BC            | <b>371</b>       | -                          | +                               | +              |
| UW 3142           | BC            | <b>375</b>       | <i>vanA</i>                | +                               | +              |
| UW 5275           | BC            | <b>376</b>       | <i>vanB</i>                | +                               | +              |
| UW 6983           | BC            | <b>377</b>       | -                          | +                               | +              |
| UW 6112           | BC            | <b>378</b>       | -                          | +                               | +              |
| UW 4208           | BC            | <b>New</b>       | -                          | +                               | +              |
| UW 6642           | BC            | <b>New</b>       | <i>vanA</i>                | +                               | +              |
| AK-EM 40          | HC            | <b>18</b>        | -                          | +                               | +              |
| AK-EM 53          | HC            | <b>413</b>       | -                          | +                               | +              |
| K226.7            | HC            | <b>18</b>        | -                          | +                               | -              |
| UW 2055           | BC            | <b>16</b>        | <i>vanA</i>                | -*                              | +              |
| UW 3695           | BC            | <b>17</b>        | -                          | +                               | +              |

|         |    |            |             |   |    |
|---------|----|------------|-------------|---|----|
| UW 3544 | BC | <b>17</b>  | <i>vanA</i> | + | -# |
| UW 5352 | BC | <b>17</b>  | <i>vanB</i> | - | +  |
| UW 6990 | BC | <b>18</b>  | -           | + | +  |
| UW 1952 | BC | <b>18</b>  | <i>vanA</i> | + | +  |
| UW 2900 | BC | <b>18</b>  | <i>vanB</i> | + | -# |
| UW 1218 | BC | <b>19</b>  | <i>vanA</i> | + | -# |
| UW 3056 | BC | <b>65</b>  | -           | + | +  |
| UW 6880 | BC | <b>78</b>  | -           | + | +  |
| UW 4671 | BC | <b>78</b>  | <i>vanA</i> | + | -  |
| UW 2457 | BC | <b>80</b>  | <i>vanA</i> | + | -  |
| UW 6985 | BC | <b>81</b>  | -           | - | +  |
| UW 2771 | BC | <b>81</b>  | <i>vanA</i> | + | -  |
| UW 6882 | BC | <b>117</b> | -           | + | -  |
| UW 1983 | BC | <b>117</b> | <i>vanA</i> | + | -  |
| UW 6805 | BC | <b>125</b> | <i>vanA</i> | + | +  |
| UW 2824 | BC | <b>132</b> | <i>vanA</i> | + | -# |
| UW 1716 | BC | <b>192</b> | -           | + | -# |
| UW 5852 | BC | <b>192</b> | <i>vanA</i> | + | +  |
| UW 5267 | BC | <b>192</b> | <i>vanB</i> | + | -# |

---

Legend: PFGE, pulsed-field gel electrophoresis; MLST, Multi-locus sequence typing; BC, blood culture; HC, human commensal; \*, Hybridization signal with PFGE slot; #, negative results in repeated experiments
